# Supplementary material for: Lethal and Sublethal Effects of Contact Insecticides and Horticultural Oils on the Hibiscus Bud Weevil, Anthonomus testaceosquamosus Linell (Coleoptera: Curculionidae)
Source: MDPI journal article supplement (doi:10.3390/insects14060544), 2023-06-11
Supplement: s1 [file s1]

Lethal and Sublethal Effects of Contact Insecticides and Horticultural Oils on the Hibiscus Bud Weevil,  
*Anthonomus testaceosquamosus* Linell (Coleoptera: Curculionidae)

A. Daniel Greene<sup>1,3</sup> (ORCID: 0000-0002-0877-2377), Xiangbing Yang<sup>2</sup> (ORCID: 0000-0001-7072-5515), Yisell Velazquez-Hernandez<sup>1</sup>, German Vargas<sup>1</sup> (ORCID: 0000-0002-8273-0140), Paul E. Kendra<sup>2</sup> (ORCID: 0000-0003-4425-0733), Catharine Mannion<sup>1</sup> and Alexandra M. Revynthi<sup>1,3</sup> (ORCID: 0000-0002-3284-3104)

<sup>1</sup>Entomology and Nematology Department, Tropical Research and Education Center, University of Florida, 18905 SW 280th St, Homestead, FL 33031, USA

<sup>2</sup>Subtropical Horticulture Research Station, United States Department of Agriculture, Agricultural Research Service, Miami, FL 33158, USA

<sup>3</sup> Corresponding authors; anthonygreene@ufl.edu and arevynthi@ufl.edu

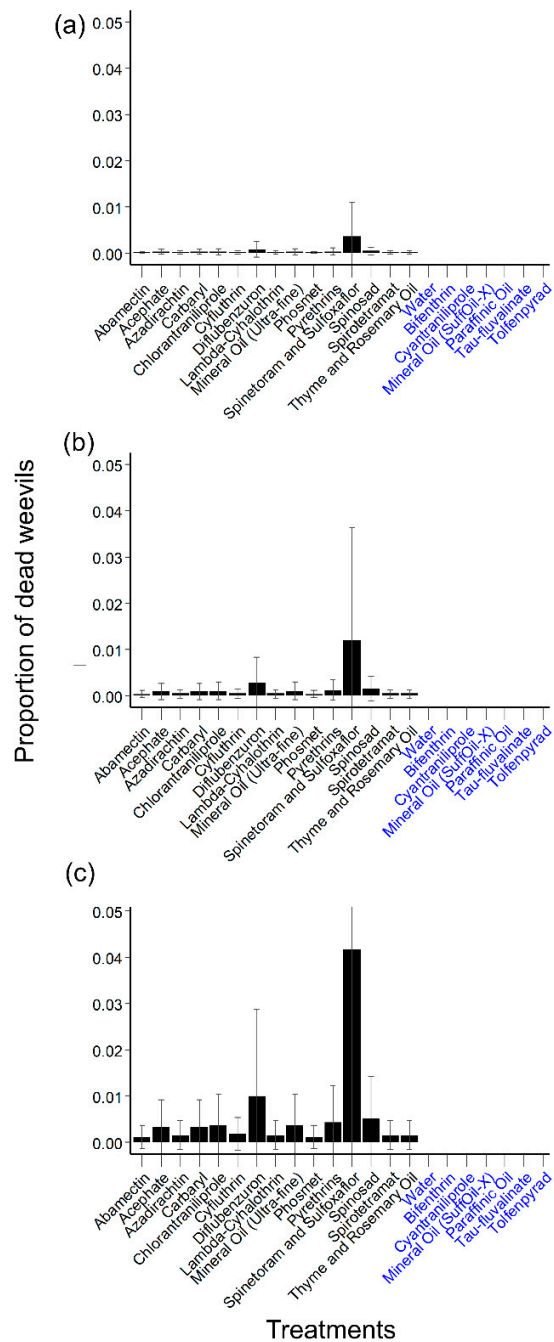

**Supplementary Figure S1** Generalized linear mixed model (GLMM)-predicted proportion of HBW mortality ( $\pm$  SE) and observed HBW mortality ( $\pm$  SE) among insecticide and horticultural oil products from hibiscus bud fixed experiments. (a) 48 hours post-experimental setup (PES), (b) 72 hours PES, and (c) 96 hours PES. Black = modeled treatments; GLMM-predicted proportion of mortality. Blue = treatments not included in models due to causing 0 or 100 percent mortality (model convergence); observed mortality data. Mortality was not observed during the 24 hours PES checkpoint. Treatments with different letters were significantly different from one another ( $p < 0.05$ ; t-tests)

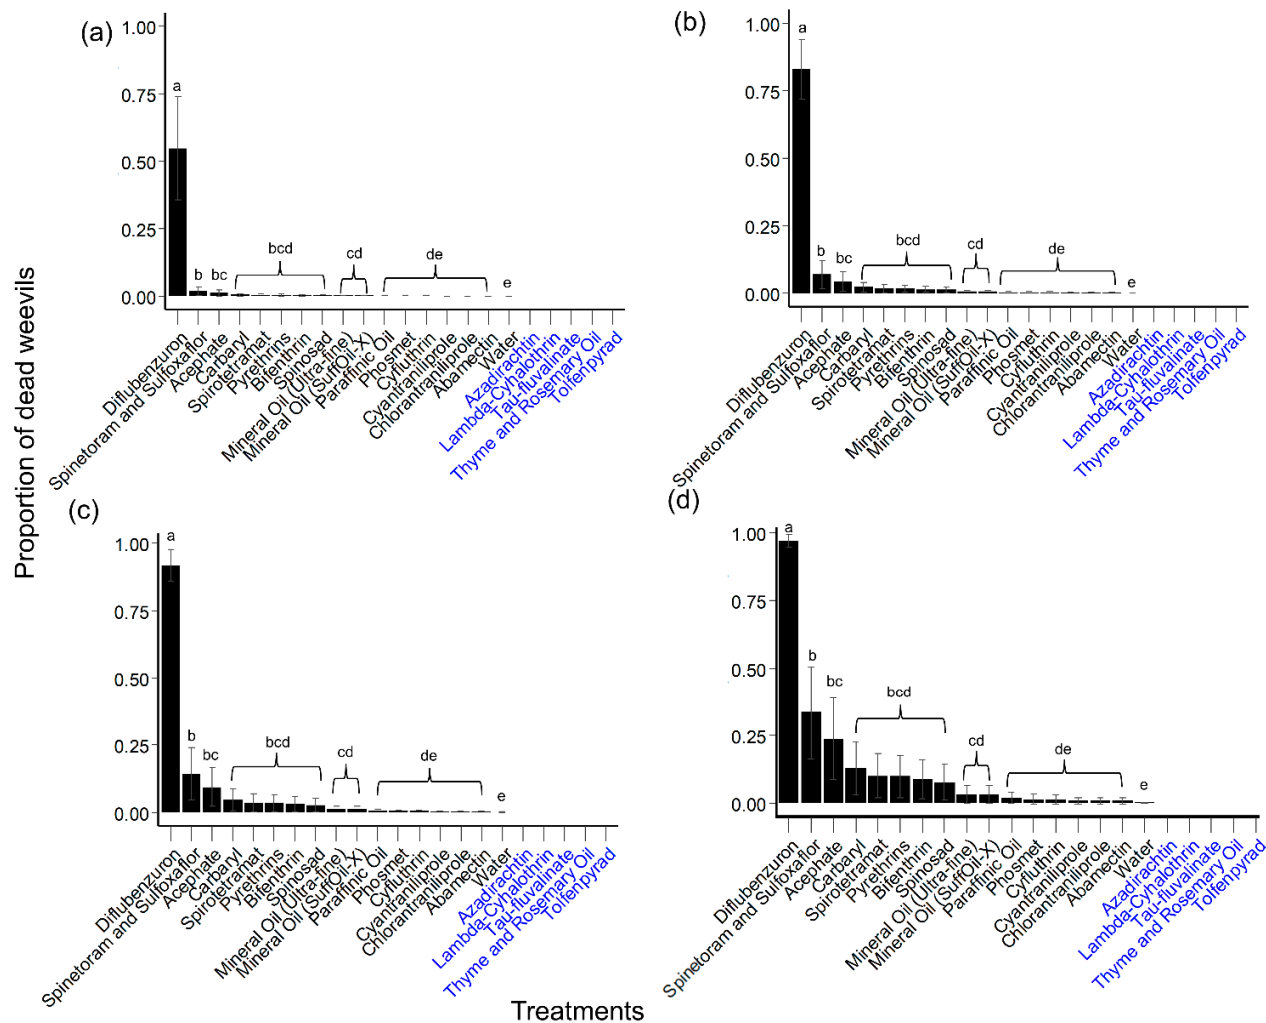

**Supplementary Figure S2** Generalized linear mixed model (GLMM)-predicted proportion of HBW mortality ( $\pm$  SE) and observed HBW mortality ( $\pm$  SE) among insecticide and horticultural oil products from hibiscus leaf fixed experiments. (a) 24 hours post-experimental setup (PES), (b) 48 hours PES, (c) 72 hours PES, and (d) 96 hours PES. Black = modeled treatments; GLMM-predicted proportion of mortality. Blue = treatments not included in models due to causing 0 or 100 percent mortality (model convergence); observed mortality data. Treatments with different letters were significantly different from one another ( $p < 0.05$ ; t-tests)

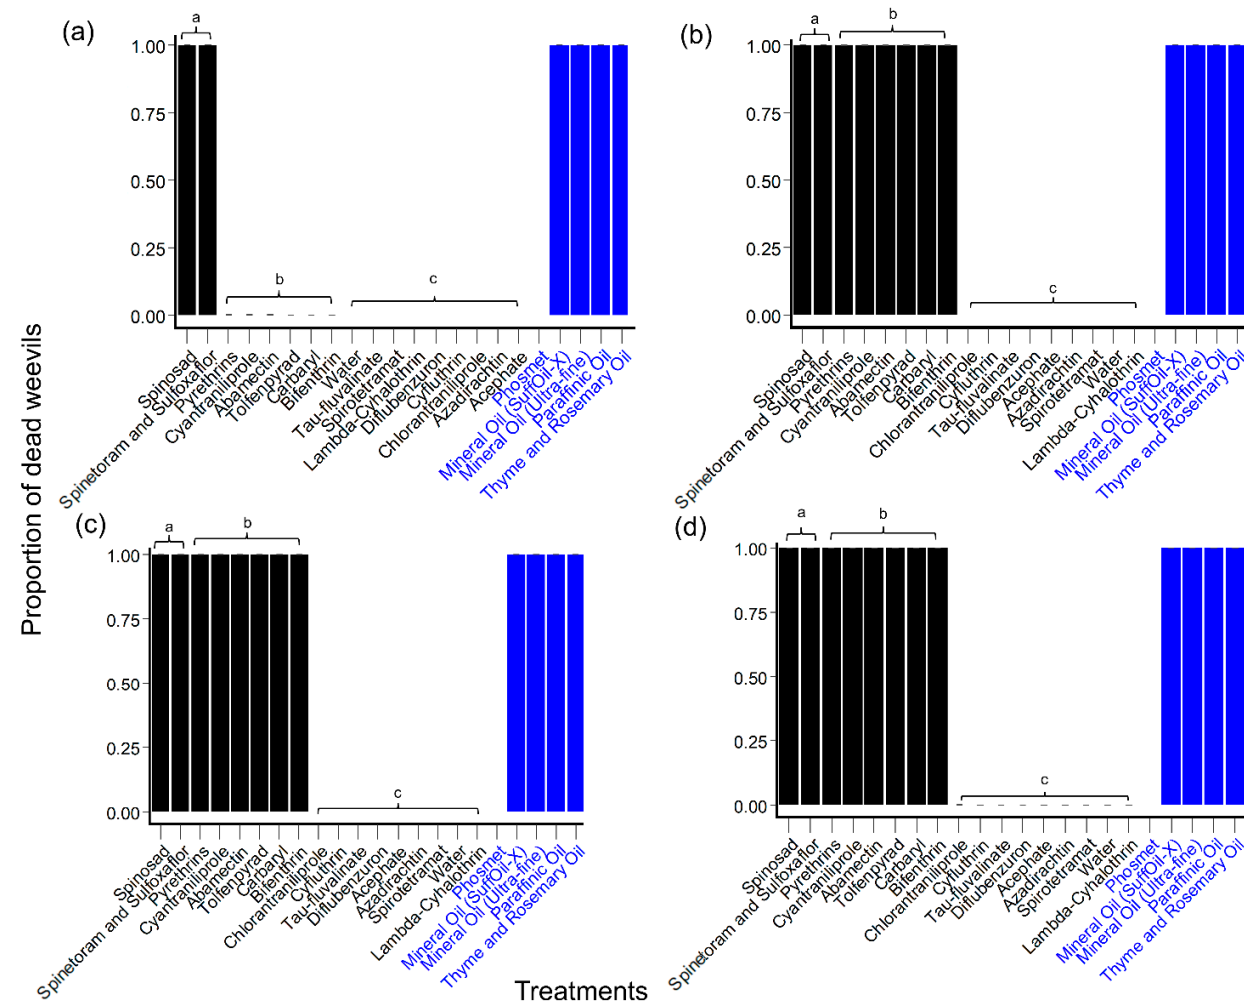

**Supplementary Figure S3** Generalized linear mixed model (GLMM)-predicted proportion of HBW mortality ( $\pm$  SE) and observed HBW mortality ( $\pm$  SE) among insecticide and horticultural oil products from direct experiments. (a) 24 hours post-experimental setup (PES), (b) 48 hours PES, (c) 72 hours PES, and (d) 96 hours PES. Black = modeled treatments; GLMM-predicted proportion of mortality. Blue = treatments not included in models due to causing 0 or 100 percent mortality (model convergence); observed mortality data. Treatments with different letters were significantly different from one another ( $p < 0.05$ ; t-tests)

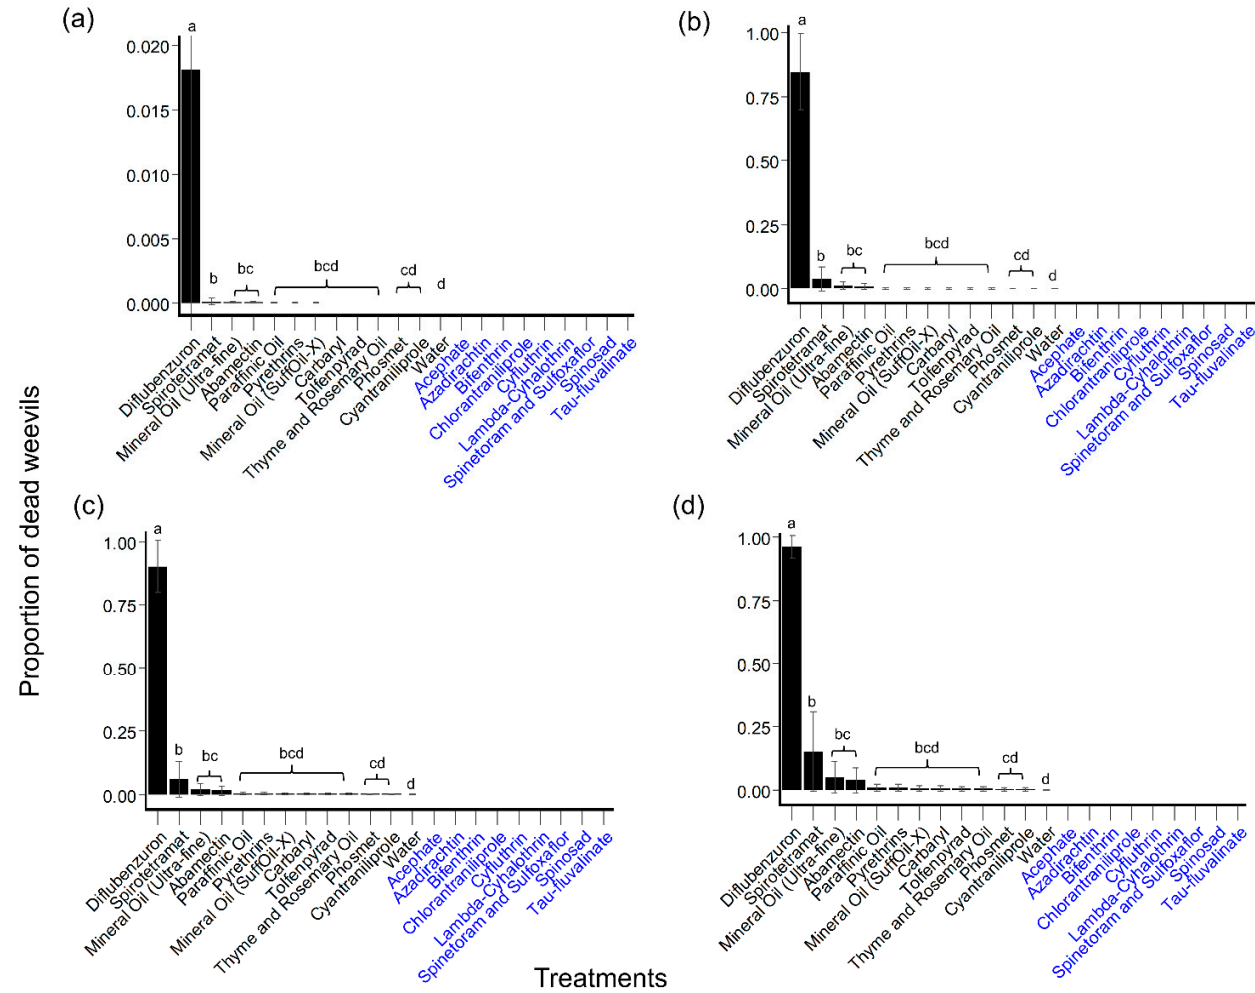

**Supplementary Figure S4** Generalized linear mixed model (GLMM)-predicted proportion of HBW mortality ( $\pm$  SE) and observed HBW mortality ( $\pm$  SE) among insecticide and horticultural oil products from hibiscus bud replacement experiments. (a) 24 hours post-experimental setup (PES), (b) 48 hours PES, (c) 72 hours PES, and (d) 96 hours PES. Black = modeled treatments; GLMM-predicted proportion of mortality. Blue = treatments not included in models due to causing 0 or 100 percent mortality (model convergence); observed mortality data. Treatments with different letters were significantly different from one another ( $p < 0.05$ ; t-tests)

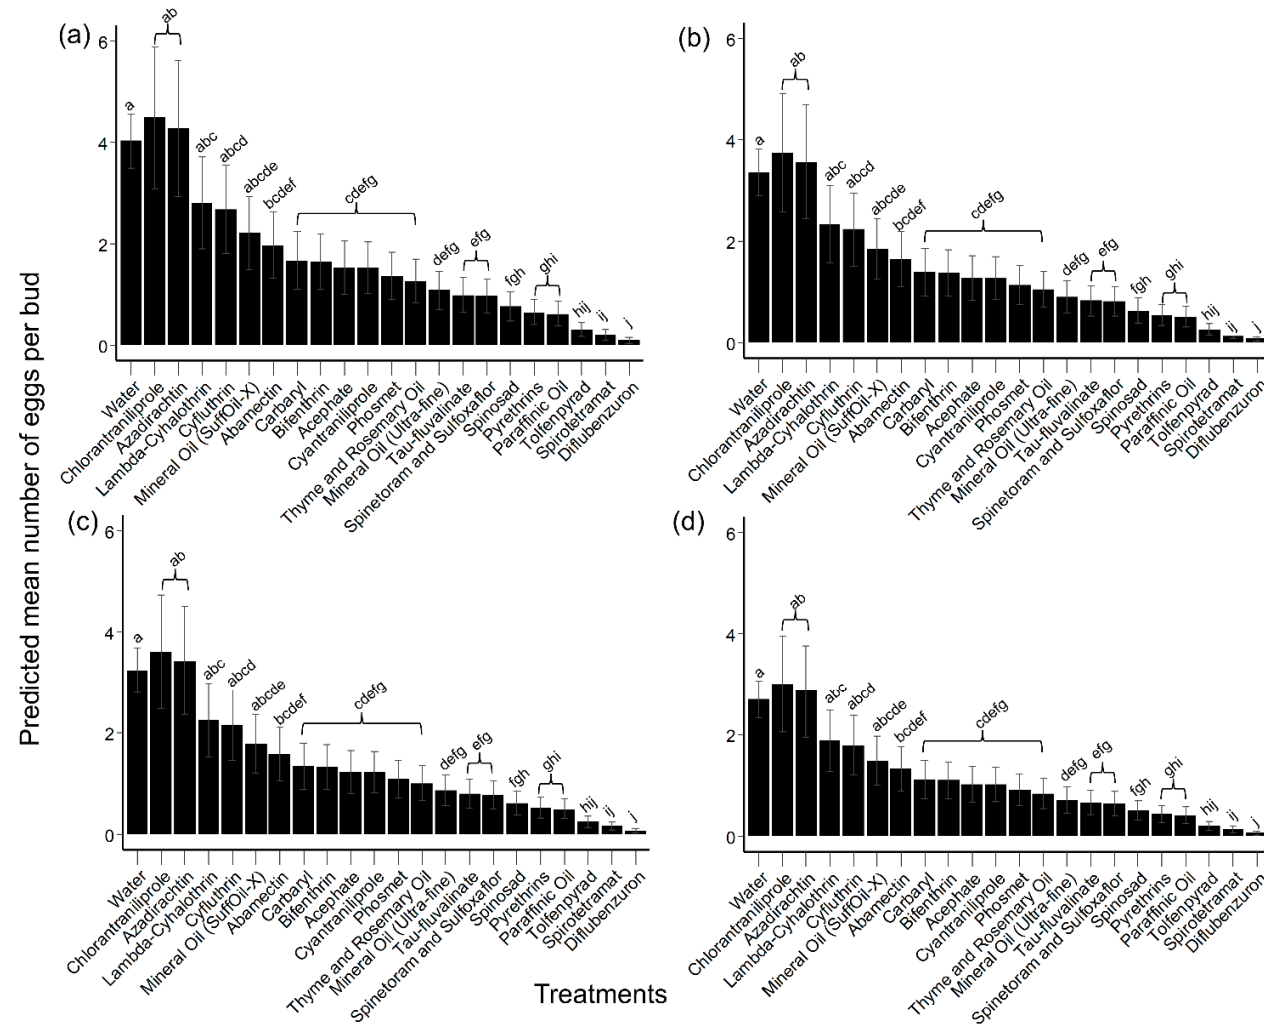

**Supplementary Figure S5** Generalized linear mixed model (GLMM)-predicted mean number ( $\pm$  SE) of HBW eggs among insecticide and horticultural oil product treatments from hibiscus bud replacement experiments. (a) 24 hours post-experimental setup (PES), (b) 48 hours PES, (c) 72 hours PES, and (d) 96 hours PES. Treatments with different letters were significantly different from one another ( $p < 0.05$ ; t-tests)

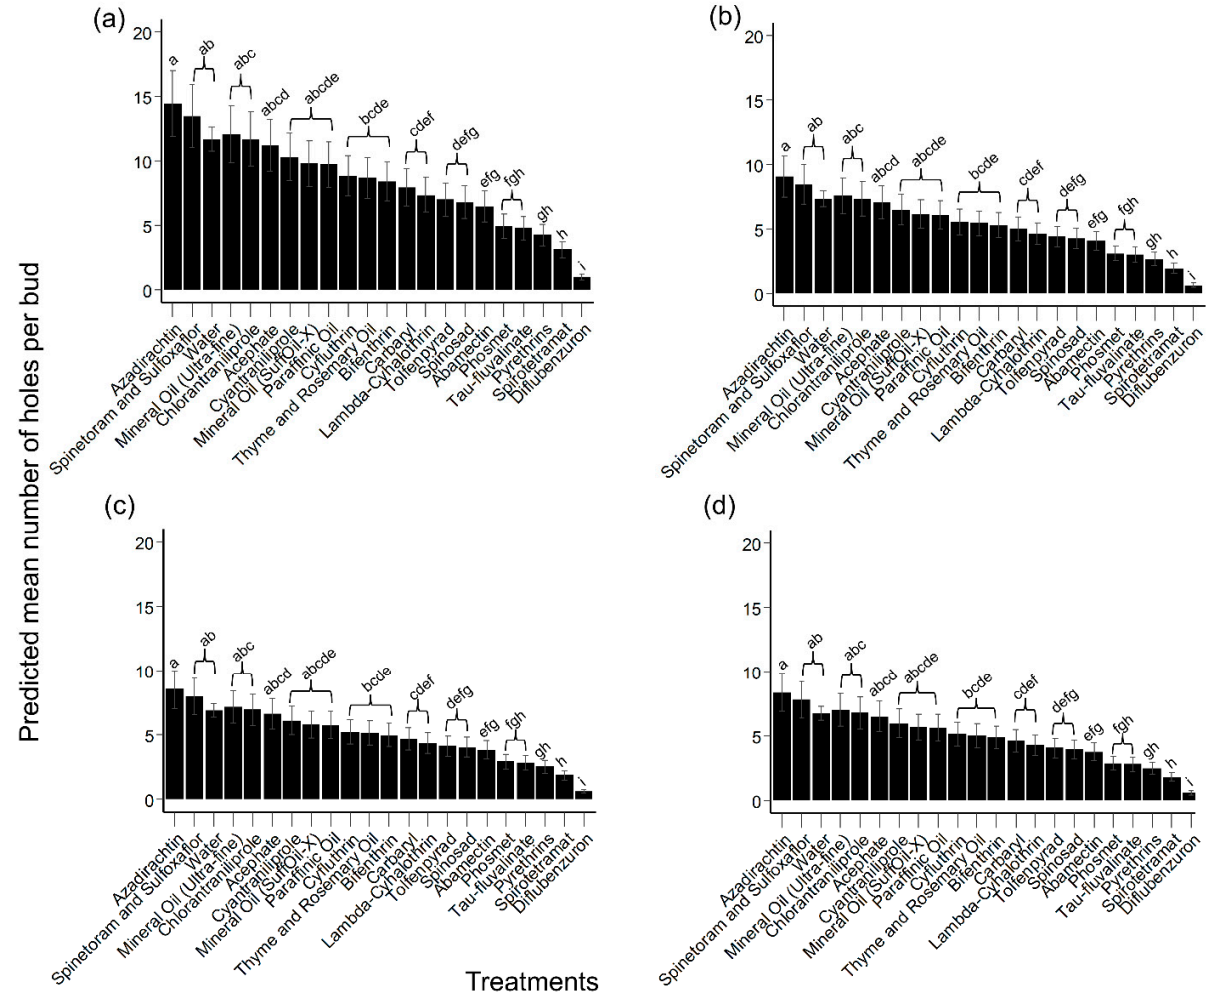

**Supplementary Figure S6** Generalized linear mixed model (GLMM)-predicted mean number ( $\pm$  SE) of HBW feeding/oviposition holes among insecticide and horticultural oil product treatments from hibiscus bud replacement experiments. (a) 24 hours post-experimental setup (PES), (b) 48 hours PES, (c) 72 hours PES, and (d) 96 hours PES. Treatments with different letters were significantly different from one another ( $p < 0.05$ ; t-tests)

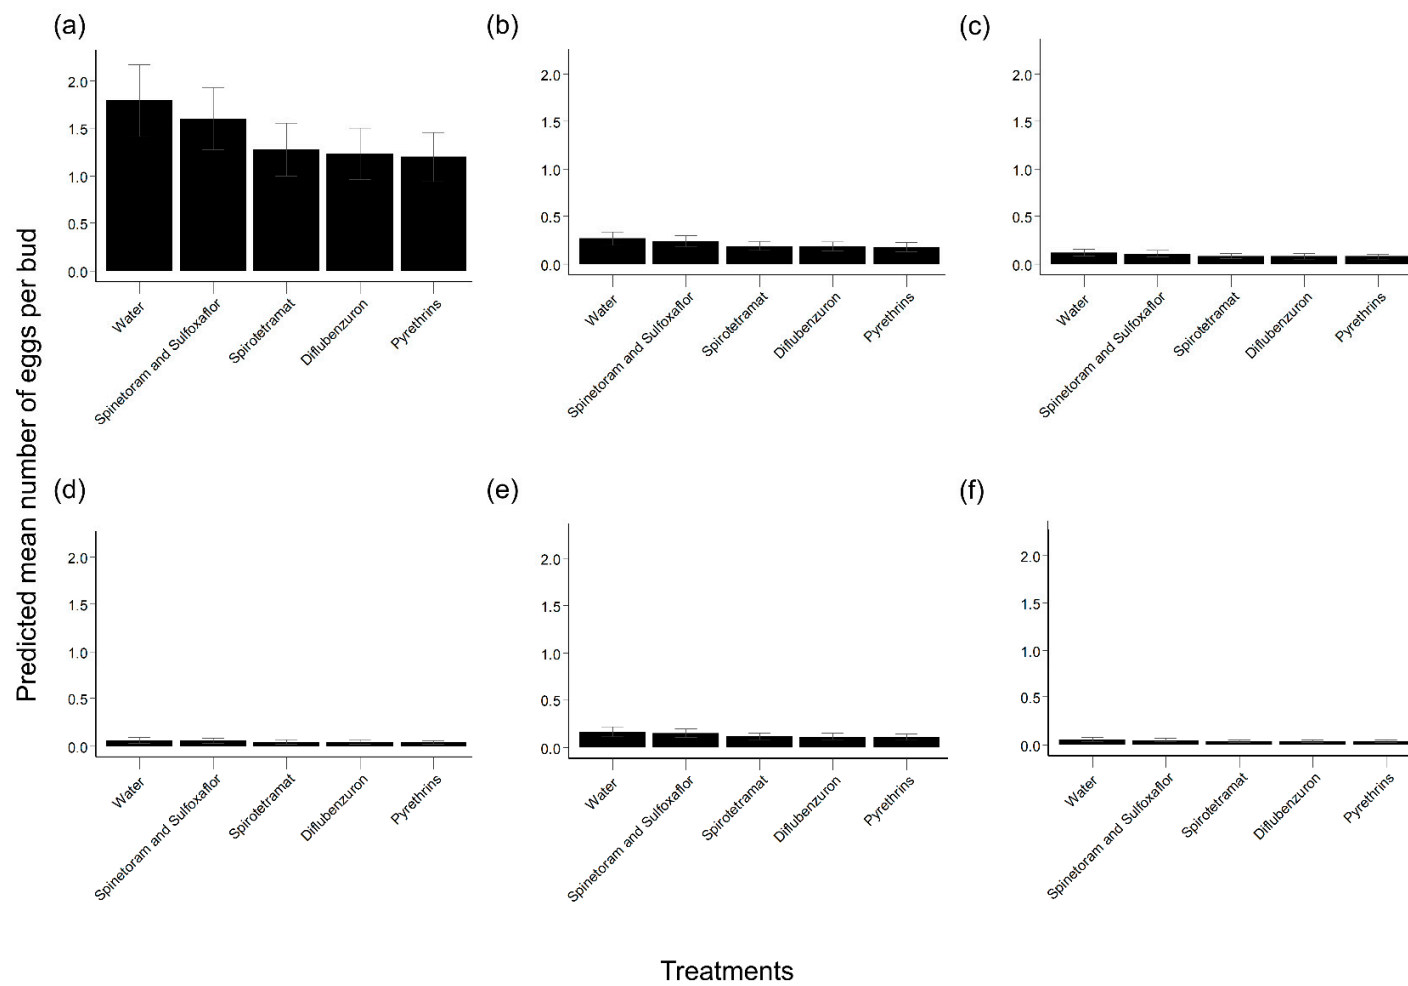

**Supplementary Figure S7** Generalized linear mixed model (GLMM)-predicted mean number ( $\pm$  SE) of HBW eggs among insecticide product treatments from hibiscus bud greenhouse experiments. (a) Prior to treatment application, (b) 1 day post-experimental setup (PES), (c) 4 days PES, (d) 7 days PES, (e) 19 days PES, and (f) 28 days PES



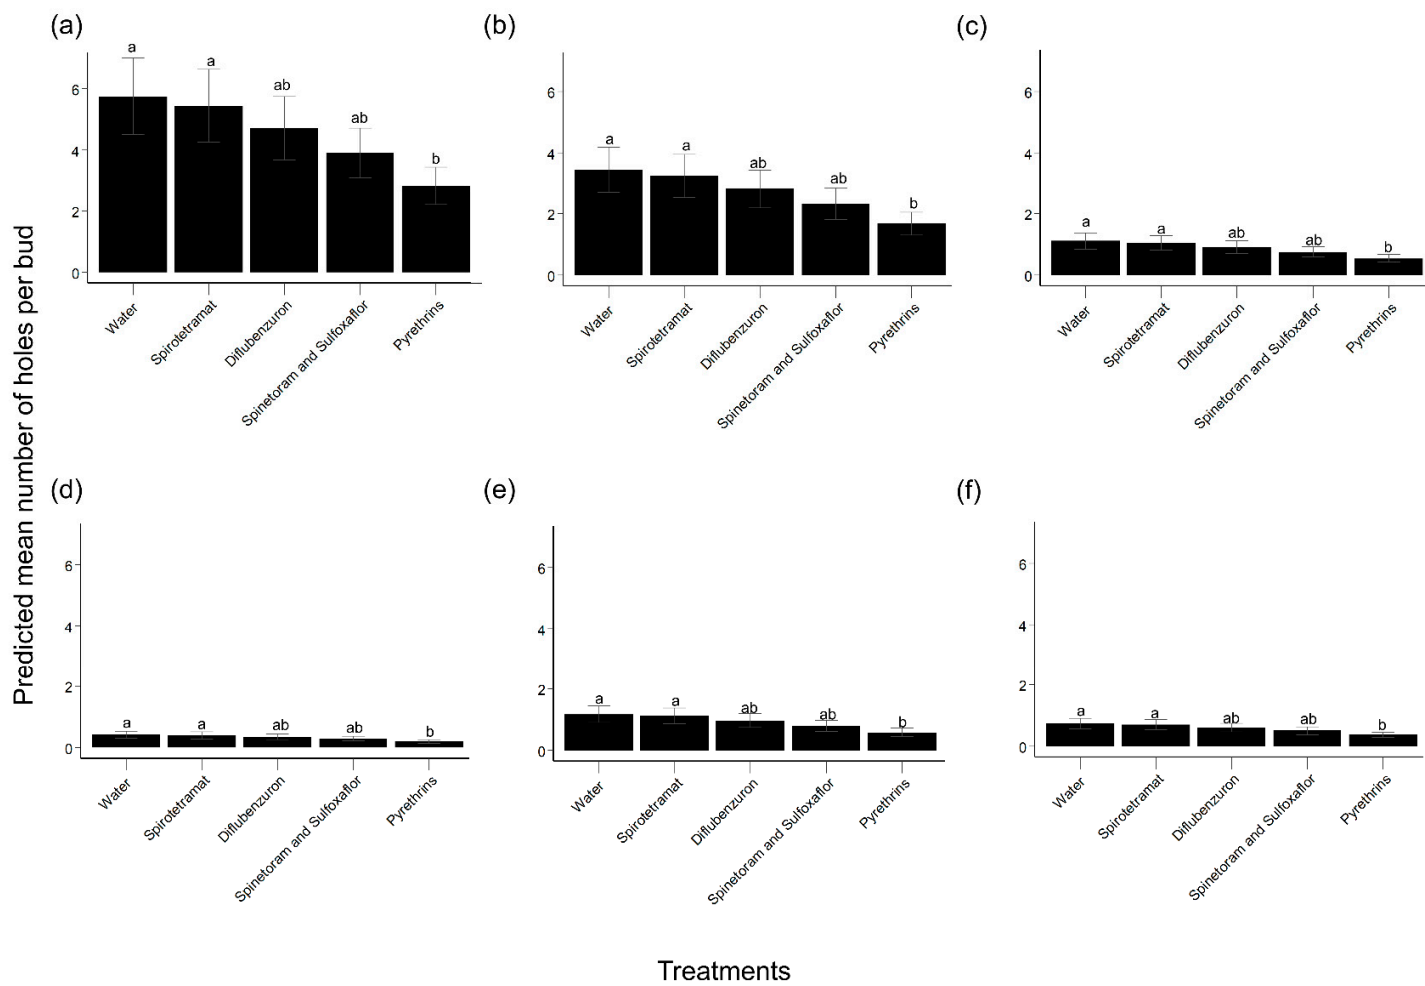

**Supplementary Figure S8** Generalized linear mixed model (GLMM)-predicted mean number ( $\pm$  SE) of HBW feeding/oviposition holes among insecticide product treatments from hibiscus bud greenhouse experiments. (a) Prior to treatment application, (b) 1 day post-experimental setup (PES), (c) 4 days PES, (d) 7 days PES, (e) 19 days PES, and (f) 28 days PES. Treatments with different letters were significantly different from one another ( $p < 0.05$ ; t-tests)

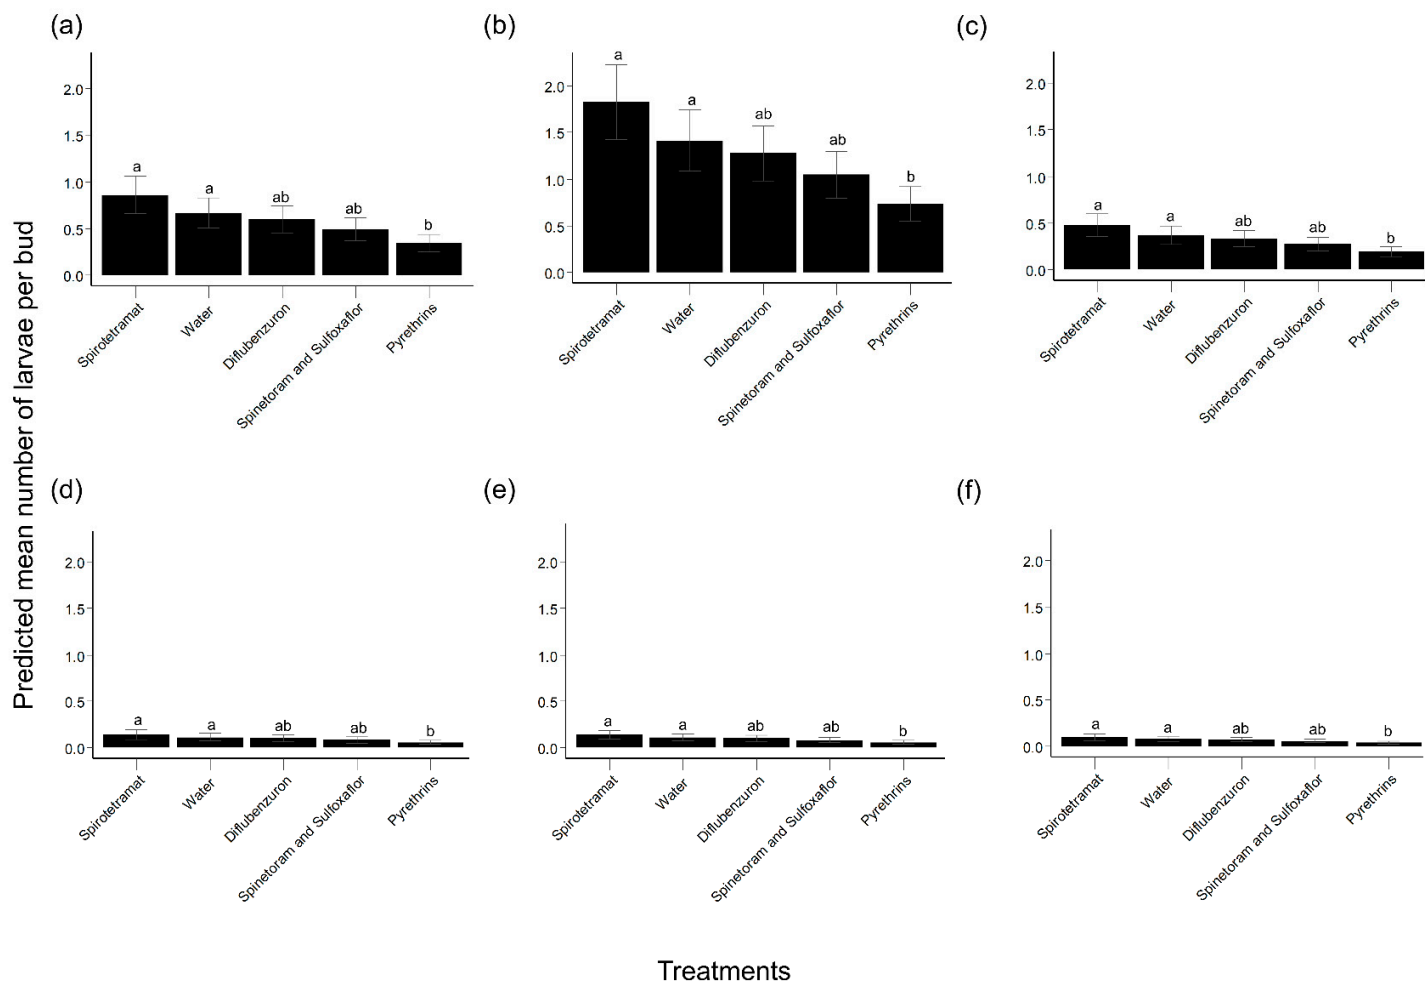

**Supplementary Figure S9** Generalized linear mixed model (GLMM)-predicted mean number ( $\pm$  SE) of HBW larvae among insecticide product treatments from hibiscus bud greenhouse experiments. (a) Prior to treatment application, (b) 1 day post-experimental setup (PES), (c) 4 days PES, (d) 7 days PES, (e) 19 days PES, and (f) 28 days PES. Treatments with different letters were significantly different from one another ( $p < 0.05$ ; t-tests)
